# Supplementary material
Source: HighWire-hosted journal article supplement (https://jhr.uwpress.org/highwire/filestream/1484/field_highwire_adjunct_files/0/JHRv55n01.pdf)
Supplement: JHRv55n01.pdf [file JHRv55n01.pdf]

# The Role of Conferences on the Pathway to Academic Impact: Evidence from a Natural Experiment

Fernanda Leon, Ben McQuillin

## ONLINE APPENDIX

In this appendix we detail the algorithm implemented to compare each conference paper title with titles retrieved in Google Scholar. We then present further tables, associated with additional econometric specifications mentioned within the text.

### A. Title-Match Algorithm

Our title-match algorithm associates, with any ordered pair  $(X_0, Y_0)$  of paper titles, a title-match dummy  $B(X_0, Y_0) \in \{0, 1\}$ . In the present case, title  $X_0$  is conference paper title and title  $Y_0$  the Google Scholar paper title. The algorithm comprises the following steps 1-5.

1. Title  $X_1$  is defined to be the portion of  $X_0$  that precedes any first occurrence of a character “?” or “:”. (Portions of paper titles that succeed these characters are often, in effect, “subtitles” with a higher tendency to change between successive versions of a paper.)
2. Titles  $X_2$  and  $Y_1$  are defined by converting titles  $X_1$  and  $Y_0$  respectively to lowercase.
3. Titles  $X_3$  and  $Y_2$  are defined by the following, ordered transformations from titles  $X_2$  and  $Y_1$  respectively. (These transformations eliminate common differences between British, American and other conventions of spelling and transliteration.)
  - (a) Every string “ence” is replaced with “ense”.
  - (b) Every string “ae” and “oe” is deleted.
  - (c) Every character “u” and “e” is deleted.
  - (d) Every string “ll” is replaced with “l”.
  - (e) Every character “z” is replaced with “s”.

- (f) Every character that is not either a digit (ASCII characters 48 to 57) or a lowercase letter (ASCII characters 97 to 122) is deleted.
4. Title  $X_3$  is partitioned into a set of  $n$  substrings,  $\mathbf{x} \equiv \{x_1, x_2, \dots, x_n\}$  such that  $x_1$  is the first five characters in  $X_3$ ,  $x_2$  the next five characters in  $X_3$ , and so forth. (So substrings  $x_1$  to  $x_{n-1}$  will each have five characters and substring  $x_n$  will have between one and five characters.) We record, as the variable  $k$ , the number of elements in  $\mathbf{x}$  that are substrings in  $Y_2$ .
  5. If  $(k/n)$  is strictly greater than 0.5 then we let  $B(X_0, Y_0) = 1$ , otherwise we let  $B(X_0, Y_0) = 0$ .

The choices of five-character substrings (in step 4) and of a 0.5 acceptance threshold (in step 5) were determined by informal experimentation. A research assistant partitioned, by subjective judgement, a sampled set  $A$  of 900 Google Scholar matches into subsets  $A_1$  (“more than 90 percent likely to be a correct match”),  $A_2$  (“less than 10 percent likely to be a correct match”) and  $A_3 \equiv A \setminus (A_1 \cup A_2)$ . Then, using  $B_1 \equiv \{(X_0, Y_0) \in A: B(X_0, Y_0) = 1\}$  and  $B_2 \equiv A \setminus B_1$ , we chose a substring length and round-number acceptance threshold to minimise  $\frac{|(A_1 \cap B_2)|}{|A_1|} + \frac{|(A_2 \cap B_1)|}{|A_2|}$ .

## B. Further Figures and Tables

*Figures A1-A5*

*Tables A1-A10*

**Figure A1**

*Conference-Authors that Petitioned Against the 2012 APSA Venue*

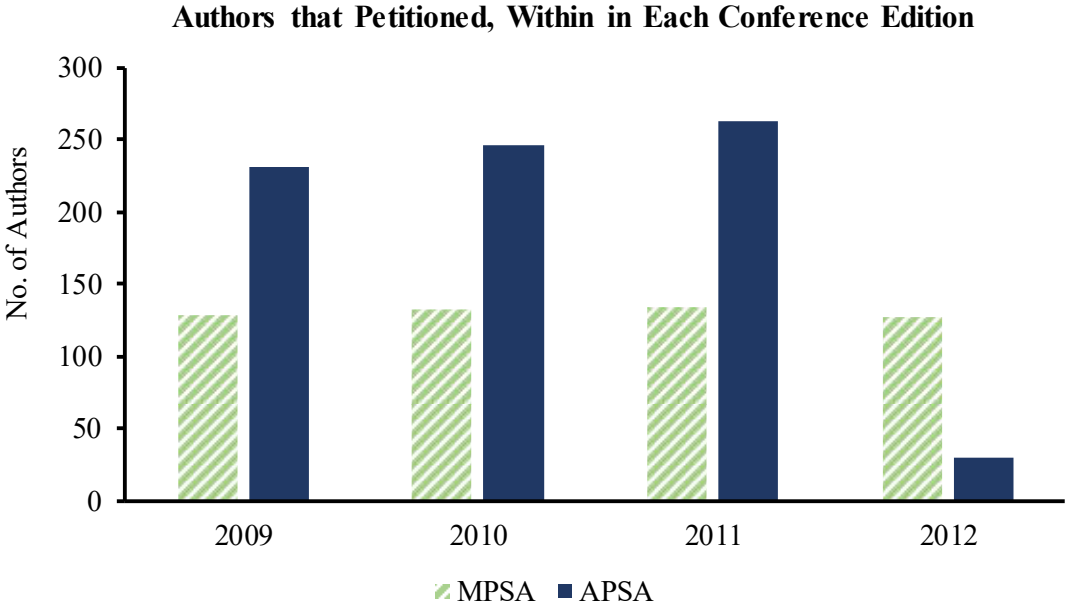

## Figure A2

Google Scholar Search Example: "Cited by" Data

(Conference paper: "Rortyan Cultural Politics and the Problem of Speaking for Others" by C. Voparil.)

Step 1: Search by authorship and short title

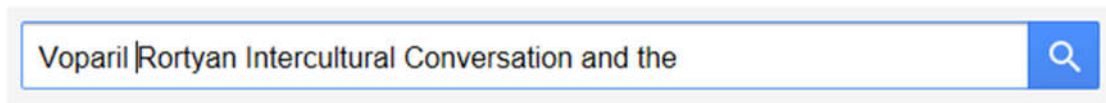

A search bar with the text "Voparil Rortyan Intercultural Conversation and the" and a magnifying glass icon on the right.

### Rortyan Intercultural Conversation and the Problem of Speaking for Others

C Voparil - 2010 - papers.ssrn.com

Abstract: This paper examines Rorty's proposals for intercultural conversation as a path to global justice. Three primary claims are advanced: that Rorty's embrace of philosophy as cultural politics is of a piece with his call in the mid-1970s for philosophers to be more involved in the cause of enlarging human freedom; that his most explicit turn away from philosophy and theory toward novels and narrative is an attempt to expand the conversation beyond the West; and that his essay "Feminism and Pragmatism" offers a picture of social

☆  [Cited by 1](#) [Related articles](#)

Step 2: Follow "cited by" link

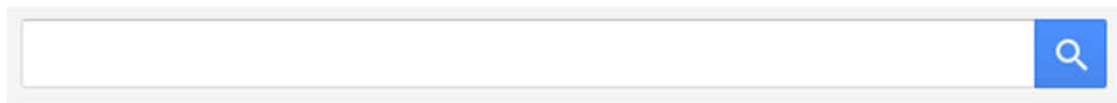

An empty search bar with a magnifying glass icon on the right.

1 result (0.01 sec)

### Rortyan Intercultural Conversation and the Problem of Speaking for Others

Search within citing articles

#### Hydric life: A Nietzschean reading of postcolonial communication

EF Ruiz-Aho - 2010 - scholarcommons.usf.edu

Abstract This dissertation addresses the question of marginalization in cross-cultural communication from the perspectives of hermeneutic philosophy and postcolonial theory. Specifically, it focuses on European colonialism's effect on language and communicative

☆  [Cited by 1](#) [Related articles](#) [All 2 versions](#)

### Figure A3

Google Scholar Search Example: "Found ... Excluding SSRN"

(Conference paper: "From the Governance of Internal Displacement to the Governance of Environmental Migration: What Can the Latter Learn from the Former?" by F. Gemenne and, P. Brucker.)

Gemenne Brucker From the governance of internal 

From the **Governance** of **Internal** Displacement to the **Governance** of Environmental Migration: What the Latter Can Learn from the Former?

[F Gemenne, P Brucker - 2013 - papers.ssrn.com](#) 

Abstract Environmental migration is often presented as one of the gravest consequences of climate change, and is already a reality in many parts of the world. Yet the protection of these migrants has not been addressed in the international normative frameworks on migration. As a result, a growing number of scholars and advocacy groups have sought to create a special convention and/or ad hoc status for these migrants, while others contended that such a legal status was not the answer. As a result, the protection of environmental

  [Related articles](#)

[CITATION] From the **governance** of **internal** displacement to the **governance** of environmental migration: what can the latter learn from the former?

[F Gemenne, P Brucker - 2013 - orbi.ulg.ac.be](#) 

... To cite this reference: <http://hdl.handle.net/2268/147491>, Title : From the **governance** of **internal** displacement to the **governance** of environmental migration: what can the latter learn from the former? Language : English. Author, co-author : **Gemenne**, François mailto [Université de Liège - ULg > Institut des sciences humaines et sociales > Centre d'études de l'ethnicité et des migrations (CEDEM) >]. Brucker, Pauline []. Publication date : 2013. Peer reviewed : Yes. On invitation : No. Audience : International. Event name : Annual Congress of the American Political Science

  [All 2 versions](#) 

## Figure A4

*Article Outcomes: Google Scholar Data (2 years after 2012 conferences)*

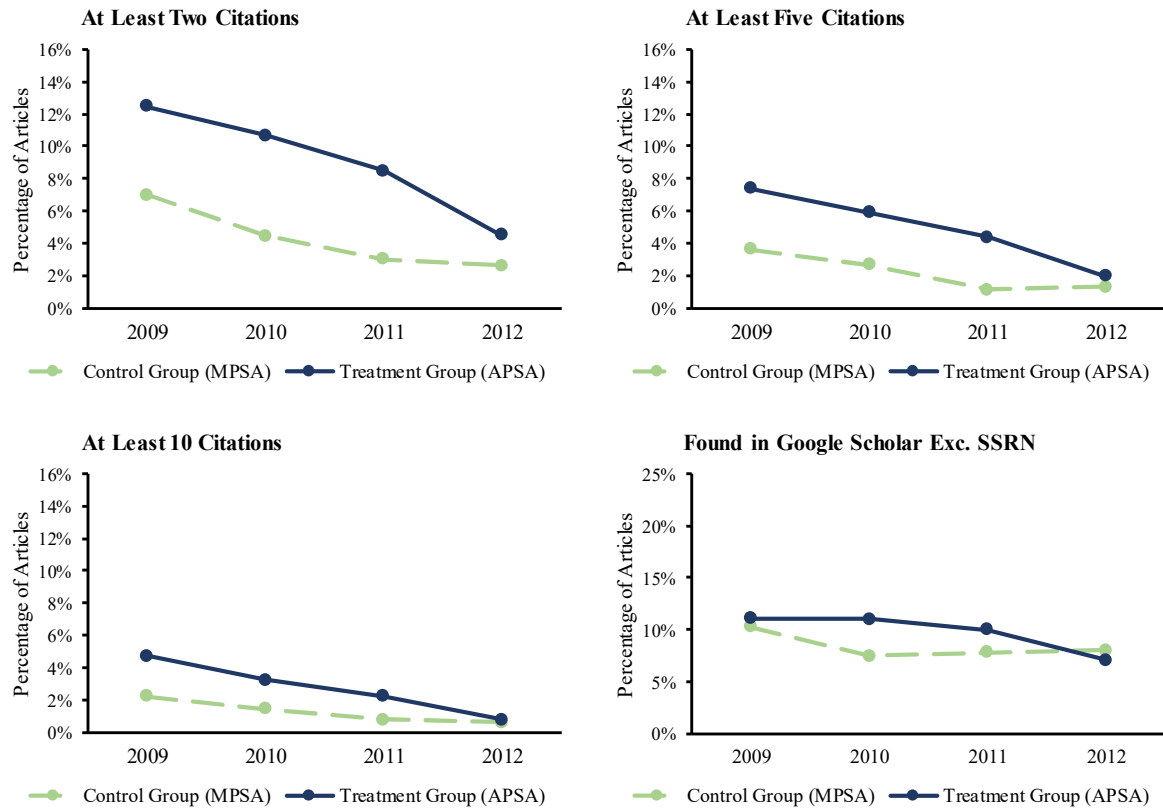

**Figure A5**

*Article Outcomes: Google Scholar Data (4 years after 2012 conferences)*

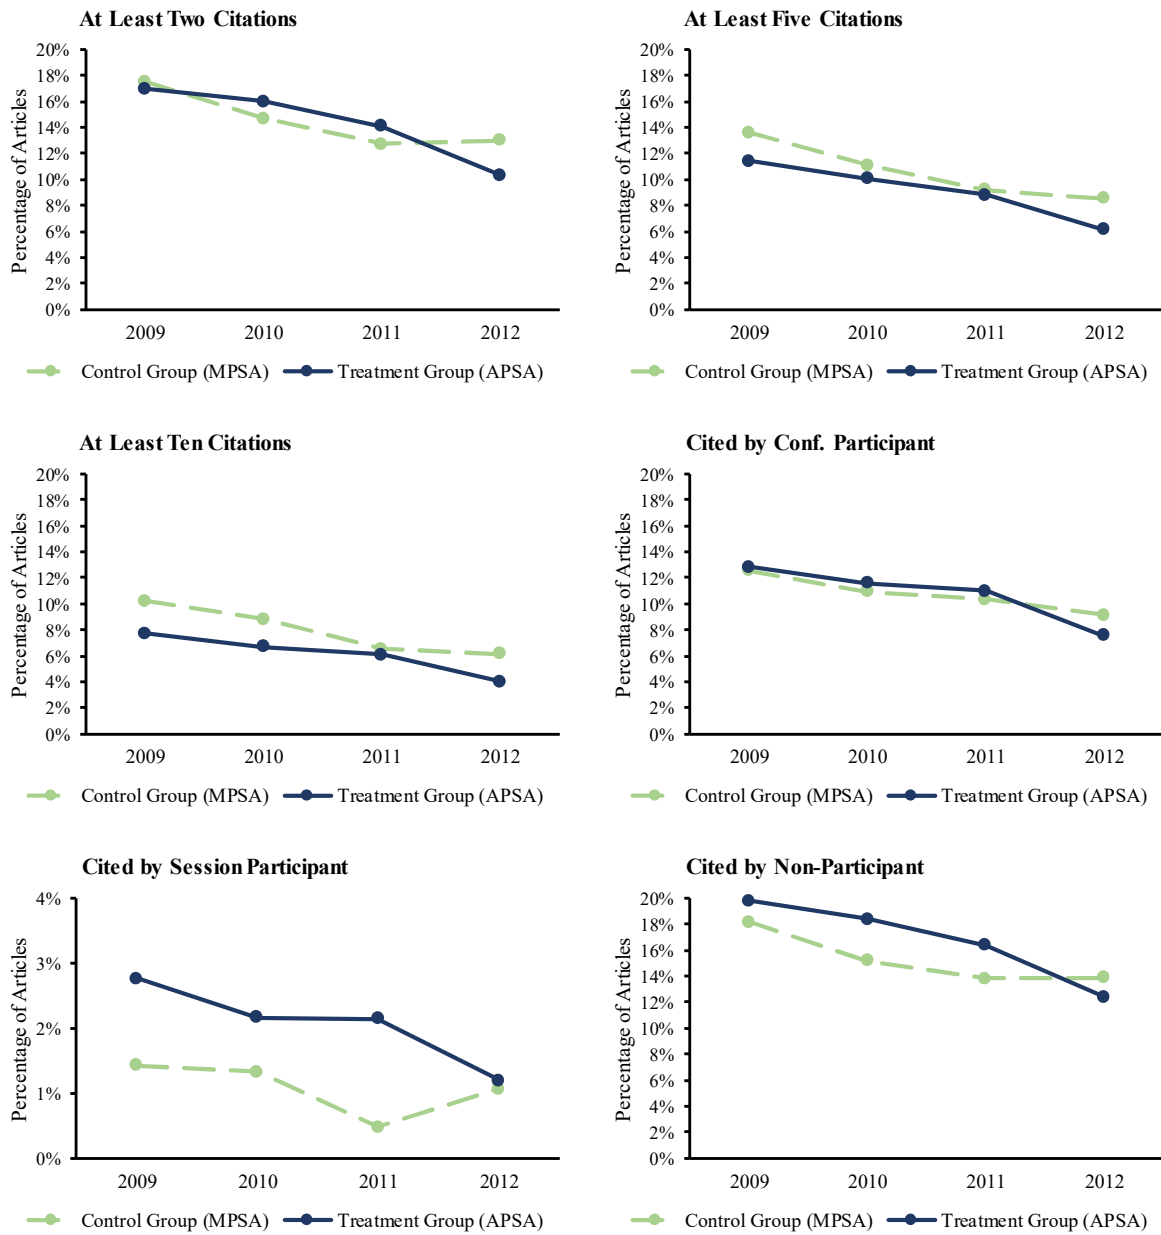

**Table A1***Top 30 Most Populated Themes in the APSA and the MPSA Annual Meetings*

| APSA MEETINGS                                        | MPSA MEETINGS                                             |
|------------------------------------------------------|-----------------------------------------------------------|
| Theme title                                          | Theme title                                               |
| Advanced Industrial Societies                        | African Politics                                          |
| <b>Comparative Democratization</b>                   | <b>Asian Politics</b>                                     |
| <b>Comparative Politics</b>                          | Canadian Politics                                         |
| <b>Comparative Politics of Developing Countries</b>  | Comparative Political Economy                             |
| <b>Conflict Processes</b>                            | <b>Comparative Politics: Developing Countries</b>         |
| <b>Elections and Voting Behavior</b>                 | <b>Comparative Politics: Industrialized Countries</b>     |
| European Politics and Society                        | <b>Comparative Politics: Political Behavior</b>           |
| Foreign Policy                                       | <b>Comparative Politics: Political Institutions</b>       |
| <b>Foundations of Political Theory</b>               | <b>Comparative Politics: Transitions Toward Democracy</b> |
| International Collaboration                          | Conflict Processes                                        |
| <b>International Political Economy</b>               | Economic Development                                      |
| <b>International Security</b>                        | Ethnicity and Nacionalism                                 |
| Law and Courts                                       | Electoral Campaigns                                       |
| Legislative Studies                                  | <b>European Politics</b>                                  |
| <b>Normative Political Theory</b>                    | Foreign Policy                                            |
| Political Communication                              | Gender and Politics                                       |
| Political Economy                                    | International Cooperation and Organization                |
| Political Methodology                                | International Political Economy                           |
| Political Organizations and Parties                  | International Relations and Domestic Politics             |
| Political Psychology                                 | International Security                                    |
| Political Thought And Philosophy                     | <b>Latin American and Caribbean Politics</b>              |
| Politics And History                                 | Mass Media and Political Communication                    |
| Presidency Research                                  | Political Participation and Turnout                       |
| Public Administration                                | Political Psychology                                      |
| Public Opinion                                       | Politics of Communist and Former Communist Countries      |
| Public Policy                                        | Politics of Middle East                                   |
| Qualitative and Multi-Method Research                | <b>Program Co-chair</b>                                   |
| Race Ethnicity and Politics                          | Public Opinion                                            |
| Politics of Communist and Former Communist Countries | Representation and Electoral Systems                      |
| Women and Politics Research                          | Voting Behavior                                           |

Note: The Top 10 most populated themes in the APSA and the MPSA Annual Meetings are highlighted.



**Table A2***Characteristics by Conference and Matched Samples: Averages*

| PANEL A                                 | Matched Sample |        |        | Full Article Sample (with all of the MPSA papers) |        |        |
|-----------------------------------------|----------------|--------|--------|---------------------------------------------------|--------|--------|
|                                         | ALL            | APSA   | MPSA   | ALL                                               | APSA   | MPSA   |
| Number of authors                       | 1.34           | 1.34   | 1.34   | 1.36                                              | 1.37   | 1.36   |
| Solo-authored                           | 71.6%          | 71.6%  | 71.6%  | 70.9%                                             | 71.2%  | 70.7%  |
| Affiliation rank                        |                |        |        |                                                   |        |        |
| [1, 10]                                 | 12.2%          | 12.2%  | 12.2%  | 11.8%                                             | 12.4%  | 11.3%  |
| [11, 100]                               | 40.7%          | 40.7%  | 40.7%  | 39.9%                                             | 41.3%  | 38.9%  |
| [101, $\infty$ )                        | 47.2%          | 47.2%  | 47.2%  | 48.3%                                             | 46.2%  | 49.8%  |
| Any author has a publication            | 49.0%          | 49.1%  | 49.0%  | 43.7%                                             | 53.5%  | 36.8%  |
| (No. publications)*(avg. impact factor) | 3.16           | 3.24   | 3.08   | 2.90                                              | 3.73   | 2.31   |
| Any author has a paper in SSRN          | 17.8%          | 17.8%  | 17.8%  | 16.2%                                             | 19.9%  | 13.5%  |
| <i>n</i>                                | 21,570         | 10,785 | 10,785 | 29,142                                            | 12,070 | 17,072 |
| PANEL B                                 | Matched Sample |        |        | Main Article Sample (with 20% of the MPSA papers) |        |        |
|                                         | ALL            | APSA   | MPSA   | ALL                                               | APSA   | MPSA   |
| Number of authors                       | 1.38           | 1.38   | 1.38   | 1.37                                              | 1.37   | 1.40   |
| Solo-authored                           | 69.5%          | 69.5%  | 69.5%  | 70.7%                                             | 71.2%  | 68.7%  |
| Affiliation rank                        |                |        |        |                                                   |        |        |
| [1, 10]                                 | 11.1%          | 11.1%  | 11.1%  | 12.2%                                             | 12.4%  | 11.3%  |
| [11, 100]                               | 38.6%          | 38.6%  | 38.6%  | 40.7%                                             | 41.3%  | 38.3%  |
| [101, $\infty$ )                        | 50.3%          | 50.3%  | 50.3%  | 47.1%                                             | 46.2%  | 50.4%  |
| Any author has a publication            | 38.5%          | 38.5%  | 38.5%  | 50.4%                                             | 53.5%  | 38.8%  |
| (No. publications)*(avg. impact factor) | 2.56           | 2.66   | 2.46   | 3.47                                              | 3.73   | 2.46   |
| Any author has a paper in SSRN          | 14.3%          | 14.3%  | 14.3%  | 18.8%                                             | 19.9%  | 14.6%  |
| <i>n</i>                                | 6,334          | 3,167  | 3,167  | 15,277                                            | 12,070 | 3,207  |

Notes: Averages in Panel A refer to APSA-MPSA matched papers based on the full article sample (with all of the MPSA papers), that is described on the right. Averages in Panel B refer to APSA-MPSA matched papers, based on the main article sample (with 20% of the MPSA papers), that is described on the right.

The explanation for the matched sample is in Section 3.2.3.

**Table A3***Articles' Outcomes and Characteristics by SSRN sample*

|                                                  | Full Article Sample (with all of the MPSA papers) |          | Main Article Sample (with 20% of the MPSA papers) |          |
|--------------------------------------------------|---------------------------------------------------|----------|---------------------------------------------------|----------|
|                                                  | Mean                                              | <i>n</i> | Mean                                              | <i>n</i> |
| <u>Outcomes</u>                                  |                                                   |          |                                                   |          |
| (All articles) Found in SSRN                     | 9.6%                                              | 29,142   | 19.8%                                             | 15,144   |
| (APSA articles) Found in SSRN                    | 19.5%                                             | 12,070   | 24.0%                                             | 12,070   |
| (MPSA articles) Found in SSRN                    | 2.6%                                              | 17,072   | 3.4%                                              | 3,074    |
| <u>Outcome for articles found in SSRN</u>        |                                                   |          |                                                   |          |
| No. of SSRN downloads                            | 95.23                                             | 2,796    | 99.70                                             | 2,995    |
| <u>Characteristics of articles found in SSRN</u> |                                                   |          |                                                   |          |
| Number of authors                                | 1.43                                              | 2,796    | 1.37                                              | 2,995    |
| Solo-authored                                    | 67.3%                                             | 2,796    | 71.0%                                             | 2,995    |
| Affiliation rank                                 |                                                   |          |                                                   |          |
| [1, 10]                                          | 9.0%                                              | 2,796    | 9.7%                                              | 2,995    |
| [11, 100]                                        | 39.1%                                             | 2,796    | 38.0%                                             | 2,995    |
| [101, ∞)                                         | 51.9%                                             | 2,796    | 52.3%                                             | 2,995    |
| Any author has a publication                     | 55.8%                                             | 2,796    | 55.8%                                             | 2,995    |
| (No. publications)*(avg. impact factor)          | 3.75                                              | 2,796    | 3.71                                              | 2,995    |
| Any author has a paper in SSRN                   | 25.2%                                             | 2,796    | 22.3%                                             | 2,995    |

Notes: The full article sample (with all of the MPSA papers) used as search criteria: authorship and short title. The estimated impacts of conferences for this sample are described in Table 3. The main article sample (with 20% of the MPSA papers) used as search criteria: authorship and full title. The estimated impacts of conferences for this sample are described in Table A4.

**Table A4***Effects of Conferences on Articles' Visibility: SSRN Outcomes*

| Outcomes                      | 2012 x APSA           |                        |                        |                        |
|-------------------------------|-----------------------|------------------------|------------------------|------------------------|
|                               | 1 year after<br>[ 1 ] | 2 years after<br>[ 2 ] | 3 years after<br>[ 3 ] | 3 years after<br>[ 4 ] |
| No. of downloads (all papers) | -6.8635<br>[1.657]*** | -7.5362<br>[1.918]***  | -8.5093<br>[2.152]***  | -5.0827<br>[1.576]***  |
| Posted in SSRN                |                       |                        | -0.0623<br>[0.0189]*** | -0.0209<br>[0.0135]    |
| <i>n</i> (all papers)         | 15,055                | 15,038                 | 15,032                 | 29,035                 |
| No. of downloads (if in SSRN) | -26.0970<br>[19.312]  | -30.1184<br>[24.953]   | -38.9954<br>[27.456]   | -22.2618<br>[13.936]   |
| <i>n</i> (papers in SSRN)     | 2,905                 | 2,953                  | 2,935                  | 2,747                  |

Notes: Observations are at the article level. "1 year after" refers to 15 months after the 2012 conference dates. "2 years after" refers to 27 months after the 2012 conference dates. "3 years after" refers to 39 months after the 2012 conference dates. Each entry represents an estimate for the 2012 APSA coefficient from a separate regression. All regressions include controls for an indicator for whether the paper is in an APSA meeting, conference-year dummies and an APSA specific year trend, covariates for the number of authors in the paper, the total number of publications by the article authors multiplied by the average journal impact factor, an indicator for whether any author had a previous paper posted in SSRN, and affiliation dummies (using the highest ranking affiliation among the article authors). The estimates in columns 1-3 use data from the main article sample (with 20% of the MPSA papers). The estimates in column 4 use data from the full article sample (with all of the MPSA papers).

Robust standard errors are in brackets.

\*\*\* Significant at the 1% level, \*\* Significant at the 5% level, \* Significant at the 10% level.

**Table A5***Download-Outliers: Papers by conference*

| Downloads | Conference |
|-----------|------------|
| 1838      | APSA2009   |
| 1334      | APSA2009   |
| 1246      | APSA2009   |
| 1182      | APSA2009   |
| 924       | APSA2009   |
| 896       | APSA2009   |
| 768       | APSA2009   |
| 754       | APSA2009   |
| 620       | APSA2009   |
| 595       | APSA2009   |
| 591       | APSA2009   |
| 525       | APSA2009   |
| 4437      | APSA2010   |
| 1721      | APSA2010   |
| 810       | APSA2010   |
| 735       | APSA2010   |
| 573       | APSA2010   |
| 535       | APSA2010   |
| 1072      | APSA2011   |
| 862       | APSA2011   |
| 829       | APSA2011   |
| 602       | APSA2011   |
| 567       | APSA2011   |
| 522       | APSA2011   |
| 967       | APSA2012   |
| 914       | APSA2012   |
| 734       | APSA2012   |
| 679       | APSA2012   |
| 606       | APSA2012   |
| 596       | APSA2012   |
| 524       | APSA2012   |
| 529       | MPSA2009   |
| 832       | MPSA2010   |
| 601       | MPSA2010   |
| 539       | MPSA2010   |
| 959       | MPSA2011   |
| 3358      | MPSA2012   |
| 1200      | MPSA2012   |
| 610       | MPSA2012   |
| 605       | MPSA2012   |
| 560       | MPSA2012   |

**Table A6***Effects of Conferences on Articles' Visibility: SSRN Outcomes (winsorizing and with varying outlier cutoffs)*

| Outcomes                                                             | Sample : | Outlier Cutoff        |          |                        |          | All Papers             |          | All Papers (Matched Sample) |          | Winsorizing<br>(At > 500 Downloads) |          |
|----------------------------------------------------------------------|----------|-----------------------|----------|------------------------|----------|------------------------|----------|-----------------------------|----------|-------------------------------------|----------|
|                                                                      |          | > 250 Downloads       |          | > 1000 Downloads       |          | 2012 x APSA            | <i>n</i> | 2012 x APSA                 | <i>n</i> | 2012 x APSA                         | <i>n</i> |
|                                                                      |          | 2012 x APSA           | <i>n</i> | 2012 x APSA            | <i>n</i> |                        |          |                             |          |                                     |          |
| No. of downloads (all papers)                                        |          | -3.0660<br>[1.2046]** | 28,935   | -4.0199<br>[1.9186]**  | 29,067   | -5.0446<br>[2.339]**   | 29076    | -3.3379<br>[2.348]          | 21,558   | -4.6980<br>[1.785]***               | 29,076   |
| Posted in SSRN                                                       |          | -0.0164<br>[0.0134]   | 28,935   | -0.0202<br>[0.0136]    | 29,067   | -0.0205<br>[0.0136]    | 29,076   | -0.0123<br>[0.0148]         | 21,558   | -0.0205<br>[0.0136]                 | 29,076   |
| No. of downloads (if in SSRN)                                        |          | -10.1793<br>[9.545]   | 2,647    | -18.7826<br>[20.000]   | 2,779    | -63.3079<br>[40.017]   | 2,788    | -11.3723<br>[28.534]        | 2,403    | -32.6270<br>[17.293]*               | 2,788    |
| <u>Excluding articles that appear in both APSA and MPSA meetings</u> |          |                       |          |                        |          |                        |          |                             |          |                                     |          |
| No. of downloads (all papers)                                        |          | -3.8306<br>[1.251]*** | 26,926   | -5.3839<br>[2.0399]*** | 27,088   | -6.4844<br>[2.495]***  | 27097    | -4.7587<br>[2.498]*         | 19,944   | -6.1065<br>[1.888]***               | 27,097   |
| Posted in SSRN                                                       |          | -0.0235<br>[0.0137]*  | 26,926   | -0.0289<br>[0.0139]**  | 27,088   | -0.0292<br>[0.0139]**  | 27,097   | -0.0191<br>[0.0149]         | 19,944   | -0.0292<br>[0.0139]**               | 27,097   |
| No. of downloads (if in SSRN)                                        |          | -15.7102<br>[13.350]  | 2,314    | -42.1299<br>[31.047]   | 2,440    | -114.0849<br>[63.973]* | 2,449    | -51.6610<br>[49.732]        | 2,124    | -61.3027<br>[25.643]**              | 2,449    |

Notes: Observations are at the article level, and outcomes are recorded “3 years after” the 2012 conference dates. All regressions include controls for an indicator for whether the paper is in an APSA meeting, conference-year dummies and an APSA specific year trend, covariates for the number of authors in the paper, the total number of publications by the article authors multiplied by the average journal impact factor, an indicator for whether any author had a previous paper posted in SSRN, and affiliation dummies (using the highest ranking affiliation among the article authors).

Robust standard errors are in brackets.

\*\*\* Significant at the 1% level, \*\* Significant at the 5% level, \* Significant at the 10% level.

**Table A7***Effects of Conferences on Articles' Visibility: SSRN Outcomes - Poisson Model*

| Outcomes                                                             |                               | 2012 x APSA<br>[ 1 ]  | <i>n</i> | 2012 x APSA<br>[ 2 ]  | <i>n</i> | 2012 x APSA<br>[ 3 ] | <i>n</i> |
|----------------------------------------------------------------------|-------------------------------|-----------------------|----------|-----------------------|----------|----------------------|----------|
| [ 1 ]                                                                | No. of downloads (all papers) | -0.0618<br>[0.2485]   | 29,101   | -0.0258<br>[0.2482]   | 29,035   | 0.3037<br>[0.2795]   | 21,524   |
| [ 2 ]                                                                | No. of downloads (if in SSRN) | -0.3427<br>[0.1762]*  | 2,755    | -0.2904<br>[0.1727]*  | 2,747    | -0.1262<br>[0.1958]  | 2,369    |
| <u>Excluding articles that appear in both APSA and MPSA meetings</u> |                               |                       |          |                       |          |                      |          |
| [ 3 ]                                                                | No. of downloads (all papers) | -0.3666<br>[0.3166]   | 27,120   | -0.3414<br>[0.3158]   | 27,056   | 0.1095<br>[0.3662]   | 19,910   |
| [ 4 ]                                                                | No. of downloads (if in SSRN) | -0.5632<br>[0.2327]** | 2,416    | -0.5134<br>[0.2305]** | 2,408    | -0.4156<br>[0.2712]  | 2,090    |
| Article covariates                                                   |                               | No                    |          | Yes                   |          | Yes                  |          |
| Matched sample                                                       |                               | No                    |          | No                    |          | Yes                  |          |

Notes: Observations are at the article level, and outcomes are recorded “3 years after” the 2012 conference dates. Columns 1 and 2 use the full article sample (with all of the MPSA papers), but exclude papers that accumulated more than 500 downloads. Column 3 uses the corresponding matched sample (explained in Section 3.2.3 and described in Table A2). Each entry in columns 1, 2 and 3 represents an estimate for the 2012 APSA coefficient from a separate regression. All regressions include controls for an indicator for whether the paper is in an APSA meeting, conference-year dummies and an APSA specific year trend. Regressions in columns 2 and 3, also include covariates for the number of authors in the paper, the total number of publications by the article authors multiplied by the average journal impact factor, an indicator for whether any author had a previous paper posted in SSRN, and affiliation dummies (using the highest ranking affiliation among the article authors). Robust standard errors are in brackets.

\*\*\* Significant at the 1% level, \*\* Significant at the 5% level, \* Significant at the 10% level.

**Table A8 - Effects of Conferences on Articles' Visibility: Google Scholar Outcomes**

*Effects of Conferences on Articles' Visibility: Google Scholar Outcomes (4 years after 2012 conferences, 3 Google Scholar hits)*

| Dependent variable: |                             | 2012 x APSA                                      |                        |                       |                      | <i>n</i>              |        |
|---------------------|-----------------------------|--------------------------------------------------|------------------------|-----------------------|----------------------|-----------------------|--------|
|                     |                             | >=1 citation                                     | >=2 citations          | >=5 citations         | >=10 citations       |                       |        |
| <u>Sample</u>       | <u>Article Controls</u>     |                                                  |                        |                       |                      |                       |        |
| [ 1 ]               | All                         | None                                             | -0.0690<br>[0.0265]*** | -0.0523<br>[0.0243]** | -0.0321<br>[0.0205]  | -0.0339<br>[0.0175]*  | 15,144 |
| [ 2 ]               | All                         | Article covariates and affiliation fixed effects | -0.0601<br>[0.0263]**  | -0.0422<br>[0.0242]*  | -0.0259<br>[0.0206]  | -0.0289<br>[0.0175]*  | 15,082 |
| [ 3 ]               | All                         | Article covariates and author fixed effects      | -0.0872<br>[0.0342]**  | -0.0675<br>[0.0309]** | -0.0424<br>[0.0275]  | -0.0476<br>[0.0237]** | 20,773 |
| [ 4 ]               | Exc. if in both conferences | Article covariates and affiliation fixed effects | -0.0633<br>[0.0268]**  | -0.0408<br>[0.0247]*  | -0.0239<br>[0.0209]  | -0.0275<br>[0.0177]   | 13,909 |
| [ 5 ]               | Matched                     | Article covariates and affiliation fixed effects | -0.0451<br>[0.0342]    | -0.0208<br>[0.0306]   | -0.0113<br>[0.0251]  | -0.0223<br>[0.0213]   | 6,198  |
| [ 6 ]               | Matched                     | Article covariates and author fixed effects      | -0.0844<br>[0.0534]    | -0.0774<br>[0.0486]   | -0.0790<br>[0.0411]* | -0.0724<br>[0.0341]** | 8,556  |

Notes: Outcomes are recorded “4 years after” the 2012 conference dates, and consider the first 3 Google Scholar hits. Each entry represents an estimate for the 2012 APSA meeting coefficient from a separate regression, using the main article sample. Observations are at the article-author level in rows 3 and 6, and at the article level in the remaining rows. All regressions include controls for an indicator for whether the paper is in an APSA meeting, conference-year dummies and an APSA specific year trend. Article covariates include the number of authors in the paper, the total number of publications by the article authors multiplied by the average journal impact factor, and an indicator for whether any author had a previous paper posted in SSRN. The matched sample is explained in Section 3.2.3 and described in Table A2.

Robust standard errors are in brackets.

\*\*\* Significant at the 1% level, \*\* Significant at the 5% level, \* Significant at the 10% level.

**Table A9***Robustness Check: Effects of Conferences on Articles' Citations*

| Method            | Outcome             | 2 years after |          | 4 years after |          | Author fixed effects |
|-------------------|---------------------|---------------|----------|---------------|----------|----------------------|
|                   |                     | 2012 APSA     | <i>n</i> | 2012 APSA     | <i>n</i> |                      |
| OLS               | Number of citations | -0.1762       | 15,082   | -0.8166       | 15,082   | No                   |
|                   |                     | [0.2934]      |          | [3.686]       |          |                      |
| OLS               | log (1+citations)   | -0.7737       | 20,773   | -1.9525       | 20,773   | Yes                  |
|                   |                     | [0.4945]      |          | [3.620]       |          |                      |
| OLS               | log (1+citations)   | -0.0603       | 15,082   | -0.1015       | 15,082   | No                   |
|                   |                     | [0.0335]*     |          | [0.0731]      |          |                      |
| Negative Binomial | Number of citations | -0.1540       | 20,773   | -0.1938       | 20,773   | Yes                  |
|                   |                     | [0.0489]***   |          | [0.0922]**    |          |                      |
| Negative Binomial | Number of citations | -0.4153       | 15,082   | -1.0510       | 15,082   | No                   |
|                   |                     | [0.5280]      |          | [0.6025]*     |          |                      |
| Poisson           | Number of citations | -0.9228       | 5,090    | -0.4647       | 7,402    | Yes                  |
|                   |                     | [0.3238]***   |          | [0.2059]**    |          |                      |
| Poisson           | Number of citations | -0.8548       | 15,082   | -0.6555       | 15,082   | No                   |
|                   |                     | [0.6136]      |          | [0.6673]      |          |                      |
| Poisson           | Number of citations | -1.1551       | 5,090    | -0.5157       | 7,402    | Yes                  |
|                   |                     | [0.1271]***   |          | [0.0451]***   |          |                      |

Notes: Outcomes are recorded “2 years after” and “4 years after” the 2012 conference dates. Each entry represents an estimate for the 2012 APSA meeting coefficient from a separate regression, using the main article sample. Observations are at the article level in odd rows, and at the article-author level in even rows. All regressions include controls for an indicator for whether the paper is in an APSA meeting, conference-year dummies and an APSA specific year trend, number of authors in the paper, the total number of publications by the article authors multiplied by the average journal impact factor, and an indicator for whether any author had a previous paper posted in SSRN.

Robust standard errors are in brackets.

\*\*\* Significant at the 1% level, \*\* Significant at the 5% level, \* Significant at the 10% level.



**Table A10**  
*Summary Statistics*

|                                                                   | Mean  | ALL<br>Stand Dev | <i>n</i> | Mean  | APSA<br><i>n</i> | Mean  | MPSA<br><i>n</i> |
|-------------------------------------------------------------------|-------|------------------|----------|-------|------------------|-------|------------------|
| <u>Panel A: Full article sample (with all of the MPSA papers)</u> |       |                  |          |       |                  |       |                  |
| Papers with a star-author                                         | 7.8%  | 0.27             | 29,142   | 9.2%  | 12,070           | 6.9%  | 17,072           |
| Papers by session type:                                           |       |                  |          |       |                  |       |                  |
| author_disc_chair_star                                            | 5.7%  | 0.23             | 29,142   | 7.6%  | 12,070           | 4.4%  | 17,072           |
| disc_chair_star                                                   | 6.6%  | 0.25             | 29,142   | 8.4%  | 12,070           | 5.4%  | 17,072           |
| author_chair_star                                                 | 22.1% | 0.42             | 29,142   | 22.8% | 12,070           | 21.6% | 17,072           |
| norole_star                                                       | 65.5% | 0.48             | 29,142   | 61.2% | 12,070           | 68.6% | 17,072           |
| <u>Panel B: Main article sample (with 20% of the MPSA papers)</u> |       |                  |          |       |                  |       |                  |
| Papers with a star-author                                         | 8.9%  | 0.28             | 15,277   | 9.2%  | 12,070           | 7.7%  | 3,207            |
| Papers by session type:                                           |       |                  |          |       |                  |       |                  |
| author_disc_chair_star                                            | 7.0%  | 0.26             | 15,277   | 7.6%  | 12,070           | 4.7%  | 3,207            |
| disc_chair_star                                                   | 7.6%  | 0.27             | 15,277   | 8.4%  | 12,070           | 4.7%  | 3,207            |
| author_chair_star                                                 | 23.0% | 0.42             | 15,277   | 22.8% | 12,070           | 23.4% | 3,207            |
| norole_star                                                       | 62.4% | 0.48             | 15,277   | 61.2% | 12,070           | 67.1% | 3,207            |

Notes: Observations are at the article level

(i) “author\_disc\_chair\_star”, (ii) “disc\_chair\_star”, (iii) “author\_chair\_star” and (iv) “norole\_star”, respectively denote articles in a session in which star-academics: (i) are assigned as a chair/discussant and as an author of a paper, (ii) are assigned only as a chair/discussant, (iii) are assigned only as an author of a paper, and (iv) have no role.
